# Supplementary material for: Survival Outcomes by Race and Ethnicity in Veterans With Nonmetastatic Castration-Resistant Prostate Cancer
Source: PubMed Central journal article supplement — JAMA Netw Open. 2023 Oct 11;6(10):e2337272. doi: 10.1001/jamanetworkopen.2023.37272 (PMC10568364; doi:10.1001/jamanetworkopen.2023.37272), 2023-10-11
Supplement: jamanetwopen-e2337272-s001.pdf [file jamanetwopen-e2337272-s001.pdf]

## Supplementary Online Content

Rasmussen KM, Patil V, Li C, et al. Survival outcomes by race and ethnicity in veterans with nonmetastatic, castration-resistant prostate cancer. *JAMA Netw Open*. 2023;6(10):e2337272. doi:10.1001/jamanetworkopen.2023.37272

**eTable.** Treatments for nmCRPC by Race, Ethnicity, and Epoch

This supplementary material has been provided by the authors to give readers additional information about their work.

**eTable. Treatments for nmCRPC by race, ethnicity, and epoch**

| Patients, n (%)                                                                                                                                                 | All<br>N=12,992 | Hispanic<br>n=826 | Non-Hispanic<br>Black<br>n=3,671 | Non-Hispanic<br>White<br>n=7,323 | Other*/<br>Unknown<br>n=1,172 |
|-----------------------------------------------------------------------------------------------------------------------------------------------------------------|-----------------|-------------------|----------------------------------|----------------------------------|-------------------------------|
| <b>Treatment</b>                                                                                                                                                |                 |                   |                                  |                                  |                               |
| ADT only                                                                                                                                                        | 7,855 (60)      | 534 (65)          | 2,269 (62)                       | 4,365 (60)                       | 687 (59)                      |
| Abiraterone ± ADT                                                                                                                                               | 232 (2)         | 7 (1)             | 35 (1)                           | 165 (2)                          | 25 (2)                        |
| Bicalutamide ± ADT                                                                                                                                              | 3,085 (24)      | 194 (23)          | 882 (24)                         | 1,736 (24)                       | 273 (23)                      |
| Enzalutamide ± ADT                                                                                                                                              | 159 (1)         | 5 (1)             | 30 (1)                           | 107 (1)                          | 17 (1)                        |
| Finasteride ± ADT                                                                                                                                               | 420 (3)         | 26 (3)            | 104 (3)                          | 243 (3)                          | 47 (4)                        |
| Ketoconazole ± ADT                                                                                                                                              | 19 (0.1)        | **                | **                               | 13 (0.2)                         | **                            |
| Other ± ADT                                                                                                                                                     | 177 (1.4)       | 8 (1)             | 47 (1.3)                         | 103 (1.4)                        | 19 (1.6)                      |
| No treatment                                                                                                                                                    | 1,045 (8.0)     | 51 (6.1)          | 301 (8.2)                        | 591 (8.1)                        | 102 (8.7)                     |
| <b>Treatment Epoch</b>                                                                                                                                          |                 |                   |                                  |                                  |                               |
| Before 2013                                                                                                                                                     | 5,217 (40)      | 280 (34)          | 1,390 (38)                       | 2,971 (41)                       | 576 (49)                      |
| 2013 and after                                                                                                                                                  | 7,775 (60)      | 546 (66)          | 2,281 (62)                       | 4,352 (59)                       | 596 (51)                      |
| Abbreviations: ADT: androgen deprivation therapy; nmCRPC: non-metastatic castration-resistant prostate cancer                                                   |                 |                   |                                  |                                  |                               |
| * <i>Other</i> includes American Indian or Alaska Native, Asian, Native Hawaiian or other Pacific Islander, unknown by patient, and patient declined to answer. |                 |                   |                                  |                                  |                               |
| ** Fewer than 5 patients identified                                                                                                                             |                 |                   |                                  |                                  |                               |
