# Supplementary material for: Survival Outcomes by Race and Ethnicity in Veterans With Nonmetastatic Castration-Resistant Prostate Cancer
Source: PubMed Central journal article supplement — JAMA Netw Open. 2023 Oct 11;6(10):e2337272. doi: 10.1001/jamanetworkopen.2023.37272 (PMC10568364; doi:10.1001/jamanetworkopen.2023.37272), 2023-10-11
Supplement: jamanetwopen-e2337272-s002.pdf [file jamanetwopen-e2337272-s002.pdf]

## **Data Sharing Statement**

Rasmussen. Survival Outcomes by Race and Ethnicity in Veterans With Nonmetastatic Castration-Resistant Prostate Cancer. *JAMA Netw Open*. Published October 11, 2023. doi:10.1001/jamanetworkopen.2023.37272

### **Data**

**Data available:** No
